# Supplementary material
Source: publisher figshare collection journal article supplement (https://asha.figshare.com/articles/dataset/_/14880360)
Supplement: Supplementary file 1 [file 1]

**Supplemental Material S2.** Summary of model fitting.

| Model      | Term added                              | AIC  | LR test            | <i>p</i> |
|------------|-----------------------------------------|------|--------------------|----------|
| <i>M*</i>  | Intercept only ( null model)            | 2731 |                    |          |
| <i>M0</i>  | <i>M</i> + Participant/Item intercepts  | 1708 | $\chi^2(2) = 1027$ | < .001   |
| <i>M1</i>  | <i>M0</i> + age                         | 1704 | $\chi^2(1) = 6.94$ | < .01    |
| <i>M2</i>  | <i>M1</i> + group                       | 1626 | $\chi^2(1) = 79.4$ | < .001   |
| <i>M3</i>  | <i>M3</i> + nonword length              | 1613 | $\chi^2(2) = 17.6$ | < .001   |
| <i>M4</i>  | <i>M3</i> + CC number                   | 1606 | $\chi^2(2) = 10.6$ | < .01    |
| <i>M5</i>  | <i>M4</i> + wordlikeness                | 1602 | $\chi^2(1) = 5.49$ | < .05    |
| <i>M6</i>  | <i>M5</i> +group:age                    | 1603 | $\chi^2(1) = 1.62$ | .20      |
| <i>M7</i>  | <i>M5</i> + group:nonword length        | 1605 | $\chi^2(2) = .82$  | .66      |
| <i>M8</i>  | <i>M6</i> + group:CC number             | 1596 | $\chi^2(2) = 9.64$ | < .001   |
| <i>M9</i>  | <i>M7</i> + group:Wordlikeness          | 1598 | $\chi^2(1) = 0.52$ | .47      |
| <i>M10</i> | <i>M8</i> + nonword length:wordlikeness | 1598 | $\chi^2(2) = 2.48$ | .29      |
| <i>M11</i> | <i>M9</i> + nonword length:CC number    | 1596 | $\chi^2(2) = 4.41$ | .11      |
| <i>M12</i> | <i>M10</i> + CC number :wordlikeness    | 1596 | $\chi^2(1) = 2.11$ | .15      |

**Note.** **M:** model. **AIC:** Akaike information criterion. **CC:** Consonant cluster. **LR:** likelihood ratio. For LR tests and *p* values refer to the comparison between the current model and the last significant model. \*LR tests and *p* values are not listed for *M* (null model) as it was not compared to a simpler model.
