# Supplementary material
Source: publisher figshare collection journal article supplement (https://asha.figshare.com/articles/dataset/_/14880360)
Supplement: Supplementary file 2 [file 1]

**Supplemental Material S1.** Individual raw scores for the TD and DLD groups on the background measures and the Arabic version of the QU-LITMUS-NWR.

| ID     | age | LITMUS-  |       |       |      |     | QU-         |
|--------|-----|----------|-------|-------|------|-----|-------------|
|        |     | SR-PA-72 | AVET  | ANPT  | MPU  | CPM | LITMUS-NWRT |
| DLD-1  | 48* | 1.39     | 51.04 | 10    | 2.58 | 13  | 36.67       |
| DLD-2  | 49  | 47.22    | 21.88 | 6.67  | 3.41 | 14  | 50          |
| DLD-3  | 49  | 12.5     | 64.58 | 6.67  | 2.68 | 13  | 26.67       |
| DLD-4  | 49  | 22.22    | 71.88 | 23.33 | 3.3  | 17  | 53.33       |
| DLD-5  | 51  | 40.28    | 75    | 20    | 3.43 | 10  | 56.67       |
| DLD-6  | 51  | 8.33     | 32.29 | 13.33 | 1.89 | 9   | 3.33        |
| DLD-7  | 53  | 11.11    | 14.58 | 10    | 1.95 | 19  | 44.83       |
| DLD-8  | 53  | 16.67    | 47.92 | 20    | 3.33 | 10  | 43.33       |
| DLD-9  | 53  | 13.89    | 56.25 | 13.33 | 3.02 | 12  | 33.33       |
| DLD-10 | 55  | 15.28    | 42.71 | 16.67 | 1.98 | NA  | 40          |
| DLD-11 | 60  | 27.78    | 82.29 | 23.33 | 3.22 | 12  | 80          |
| DLD-12 | 57  | 1.39     | 37.5  | 3.33  | 2.95 | 10  | 43.33       |
| DLD-13 | 57  | 6.94     | 47.92 | 3.33  | 3.68 | 12  | 50          |
| DLD-14 | 60  | 2.78     | 47.92 | 16.67 | 3.4  | 10  | 46.67       |
| DLD-15 | 61  | 43.06    | 38.54 | 16.67 | 2.92 | 13  | 66.67       |
| DLD-16 | 60  | 20.83    | 84.38 | 23.33 | 3.22 | 14  | 56.67       |
| DLD-17 | 62  | 23.61    | 78.13 | 10    | 3.97 | 13  | 43.33       |
| DLD-18 | 67  | 43.06    | 89.58 | 26.67 | 2.95 | 18  | 73.33       |
| DLD-19 | 70  | 43.33    | 71.88 | 36.67 | 4.29 | 22  | 56.67       |
| DLD-20 | 81  | 6.94     | 76.04 | 23.33 | 2.8  | 13  | 53.33       |
| DLD-21 | 81  | 27.78    | 71.88 | 33.33 | 4.23 | 19  | 60          |
| DLD-22 | 59  | 51.39    | 48.96 | 43.33 | 2.6  | 15  | 76.67       |
| DLD-23 | 82  | 47.22    | 72.92 | 36.67 | 4.51 | 23  | 86.67       |
| DLD-24 | 73  | 56.94    | 70.83 | 73.33 | 3.11 | 13  | 83.33       |
| DLD-25 | 82  | 27.78    | 72.92 | 23.33 | 3.93 | 19  | 26.67       |
| DLD-26 | 82  | 2.78     | 78.13 | 36.67 | 4.51 | 23  | 16.67       |
| DLD-27 | 60  | 2.78     | 62.5  | 30    | 2.16 | 14  | 70          |
| DLD-28 | 69  | 23.61    | 72.92 | 0     | 4.61 | 19  | 70          |

| ID     | age | LITMUS-  |       |       |      |     | QU-   | LITMUS- |
|--------|-----|----------|-------|-------|------|-----|-------|---------|
|        |     | SR-PA-72 | AVET  | ANPT  | MPU  | CPM | NWRT  |         |
| DLD-29 | 64  | 44.44    | 78.13 | 36.67 | 3.47 | 16  | 43.33 |         |
| DLD-30 | 48  | 50       | 63.54 | 23.33 | 3.39 | 13  | 73.33 |         |
| TD-1   | 79  | 69.44    | 98.96 | 90    | 6.49 | 20  | 83.33 |         |
| TD-2   | 65  | 91.67    | 100   | 96.67 | 6.28 | 14  | 100   |         |
| TD-3   | 71  | 91.67    | 100   | 100   | 5.16 | 22  | 96.67 |         |
| TD-4   | 48  | 73.61    | 94.79 | 56.67 | 3.15 | 9   | 96.67 |         |
| TD-5   | 49  | 86.11    | 92.71 | 73.33 | 3.9  | 15  | 96.67 |         |
| TD-6   | 50  | 37.5     | 90.63 | 53.33 | 3.96 | 12  | 66.67 |         |
| TD-7   | 50  | 70.83    | 97.92 | 80    | 4.39 | 10  | 100   |         |
| TD-8   | 51  | 70.83    | 93.75 | 23.33 | 4.29 | 11  | 100   |         |
| TD-9   | 51  | 80.56    | 84.38 | 26.67 | 4.88 | 14  | 93.33 |         |
| TD-10  | 51  | 59.72    | 95.83 | 26.67 | 4.66 | 16  | 86.67 |         |
| TD-11  | 53  | 87.5     | 97.92 | 80    | 4.59 | 15  | 100   |         |
| TD-12  | 54  | 90.28    | 100   | 76.67 | 5.53 | 12  | 100   |         |
| TD-13  | 56  | 93.06    | 100   | 83.33 | 5.2  | 13  | 93.33 |         |
| TD-14  | 56  | 83.33    | 100   | 56.67 | 5.03 | 13  | 96.67 |         |
| TD-15  | 56  | 30.56    | 100   | 43.33 | 4.83 | 13  | 83.33 |         |
| TD-16  | 56  | 65.28    | 96.88 | 36.67 | 4.14 | 15  | 93.33 |         |
| TD-17  | 57  | 80.56    | 97.92 | 70    | 4.43 | 12  | 86.67 |         |
| TD-18  | 57  | 69.44    | 87.5  | 40    | 5.57 | 11  | 93.33 |         |
| TD-19  | 57  | 81.94    | 100   | 93.33 | 4.63 | 17  | 90    |         |
| TD-20  | 60  | 79.17    | 100   | 36.67 | 5.61 | 13  | 90    |         |
| TD-21  | 60  | 84.72    | 100   | 90    | 5.02 | 12  | 100   |         |
| TD-22  | 62  | 95.83    | 100   | 70    | 4.9  | 12  | 96.67 |         |
| TD-23  | 62  | 90.28    | 100   | 90    | 5.4  | 22  | 100   |         |
| TD-24  | 64  | 95.83    | 100   | 83.33 | 5.11 | 12  | 100   |         |
| TD-25  | 56  | 66.67    | 90.63 | 30    | 7.03 | 14  | 83.33 |         |
| TD-26  | 61  | 76.39    | 100   | 63.33 | 5.5  | 14  | 90    |         |
| TD-27  | 66  | 90.28    | 100   | 90    | 5.27 | 16  | 96.67 |         |
| TD-28  | 71  | 95.83    | 100   | 100   | 6.42 | 16  | 96.67 |         |

| ID    | age | LITMUS-  |       |       |      |     | QU-   | LITMUS- |
|-------|-----|----------|-------|-------|------|-----|-------|---------|
|       |     | SR-PA-72 | AVET  | ANPT  | MPU  | CPM | NWRT  |         |
| TD-29 | 76  | 80.56    | 100   | 53.33 | 6.03 | 20  | 83.33 |         |
| TD-30 | 72  | 87.5     | 100   | 100   | 6.64 | 21  | 90    |         |
| TD-31 | 73  | 94.44    | 100   | 90    | 5.69 | 12  | 100   |         |
| TD-32 | 60  | 84.72    | 97.92 | 83.33 | 6.31 | 12  | 96.67 |         |
| TD-33 | 48  | 95.83    | 85.42 | 53.33 | 3.35 | 10  | 96.67 |         |
| TD-34 | 48  | 84.72    | 91.67 | 43.33 | 4.49 | 14  | 96.67 |         |
| TD-35 | 73  | 83.33    | 98.96 | 93.33 | 6.78 | 18  | 83.33 |         |
| TD-36 | 57  | 68.06    | 83.33 | 40    | 4.03 | 18  | 63.33 |         |
| TD-37 | 67  | 86.11    | 88.54 | 73.33 | 4.83 | 18  | 100   |         |
| TD-38 | 57  | 81.94    | 73.96 | 50    | 5.76 | 16  | 100   |         |
| TD-39 | 56  | 59.72    | 82.29 | 63.33 | 3.79 | 14  | 40    |         |
| TD-40 | 70  | 90.28    | 100   | 90    | 5.11 | 18  | 100   |         |
| TD-41 | 48  | 58.33    | 85.42 | 20    | 4.12 | 15  | 90.63 |         |
| TD-42 | 70  | 90.28    | 100   | 90    | 5.11 | 18  | 100   |         |
| TD-43 | 63  | 95.83    | 96.88 | 60    | 4.93 | 23  | 100   |         |
| TD-44 | 80  | 97.22    | 100   | 100   | 5.69 | 23  | 100   |         |
| TD-45 | 77  | 95.83    | 100   | 100   | 6.23 | 22  | 100   |         |
| TD-46 | 66  | 87.5     | 98.96 | 66.67 | 5.15 | 14  | 90    |         |
| TD-47 | 64  | 95.83    | 100   | 86.67 | 4.78 | 17  | 100   |         |
| TD-48 | 74  | 90.28    | 100   | 100   | 5.13 | 16  | 100   |         |
| TD-49 | 78  | 69.44    | 94.79 | 86.67 | 6.87 | 17  | 90    |         |
| TD-50 | 76  | 88.89    | 100   | 100   | 5.97 | 20  | 96.67 |         |
| TD-51 | 76  | 86.11    | 100   | 100   | 6.78 | 17  | 100   |         |
| TD-52 | 79  | 83.33    | 100   | 96.67 | 5.89 | 22  | 100   |         |
| TD-53 | 71  | 93.06    | 100   | 93.33 | 7.16 | 14  | 100   |         |
| TD-54 | 67  | 98.61    | 100   | 100   | 5.67 | 17  | 100   |         |
| TD-55 | 73  | 87.5     | 100   | 100   | 6.08 | 16  | 100   |         |
| TD-56 | 78  | 94.44    | 100   | 96.67 | 6.43 | 17  | 100   |         |
| TD-57 | 80  | 84.72    | 100   | 100   | 7.48 | 18  | 100   |         |
| TD-58 | 69  | 87.5     | 100   | 96.67 | 5.19 | 22  | 100   |         |

| <b>ID</b> | <b>age</b> | <b>LITMUS-</b>  |             |             |            |            | <b>QU-</b>                    |
|-----------|------------|-----------------|-------------|-------------|------------|------------|-------------------------------|
|           |            | <b>SR-PA-72</b> | <b>AVET</b> | <b>ANPT</b> | <b>MPU</b> | <b>CPM</b> | <b>LITMUS-</b><br><b>NWRT</b> |
| TD-59     | 78         | 100             | 100         | 100         | 6.19       | 23         | 100                           |
| TD-60     | 78         | 95.83           | 100         | 93.33       | 5.98       | 15         | 100                           |

**Note.** **LITMUS-SR-PA-72** = Palestinian Arabic LITMUS Sentence Repetition Test. **AVET**: Arabic Verb Elicitation Test. **ANPT**: Arabic Noun Plurals Test. **MPU**: Mean Morpheme per Utterance. **CPM**: Colored Progressive Matrices (Raven, 2007). **QU-NWRT** = Quasi-Universal Nonword Repetition Test. **DLD** = Developmental Language Disorder. **TD** = Typically Developing.

\*Age is reported in months.
